# Supplementary material for: Neutrophils Directly Recognize Group B Streptococci and Contribute to Interleukin-1β Production during Infection
Source: PLOS journal article supplement (doi:10.1371/journal.pone.0160249), 2016-08-10
Supplement: S4 (10.1371/journal.pone.0160249.s004) [file journal.pone.0160249.s004]

**S1 Table. Effect of anti-Ly6G treatment on blood polymorphonuclear leukocytes counts**

|             | 24 h                 | 48 h    | 72 h    |
|-------------|----------------------|---------|---------|
| control IgG | 6.1±0.5 <sup>a</sup> | 7.3±0.5 | 5.8±0.7 |
| anti-Ly6G   | 0.5±0.2              | 0.6±0.3 | 0.7±0.3 |

<sup>a</sup> Percentage of Ly6G<sup>+</sup> cells in peripheral blood. All the values are means ± SD
